# Supplementary material for: Direct plasma treatment of caryopses after flowering in brewer’s rice cultivar Yamadanishiki enhanced those grain qualities through “Smart Agriculture System”
Source: PubMed Central journal article supplement — Sci Rep. 2024 Nov 27;14:29454. doi: 10.1038/s41598-024-78620-y (PMC11603052; doi:10.1038/s41598-024-78620-y), 2024-11-27
Supplement: 41598_2024_78620_MOESM1_ESM.pdf [file 41598_2024_78620_MOESM1_ESM.pdf]

**SUPPORTING INFORMATION**

| Flowering day                                                                            | Plasma treatment                                                                         |
|------------------------------------------------------------------------------------------|------------------------------------------------------------------------------------------|
|  Aug 31 |  DAF 1  |
|  Sep 4  |  DAF 5  |
|  Sep 7  |  DAF 10 |
|  Sep 8  |  DAF 15 |
|  Sep 9  |         |
|  Sep 11 |                                                                                          |

Supplementary Figure S1. Markings used to indicate DAF and plasma treatment on flower glume.

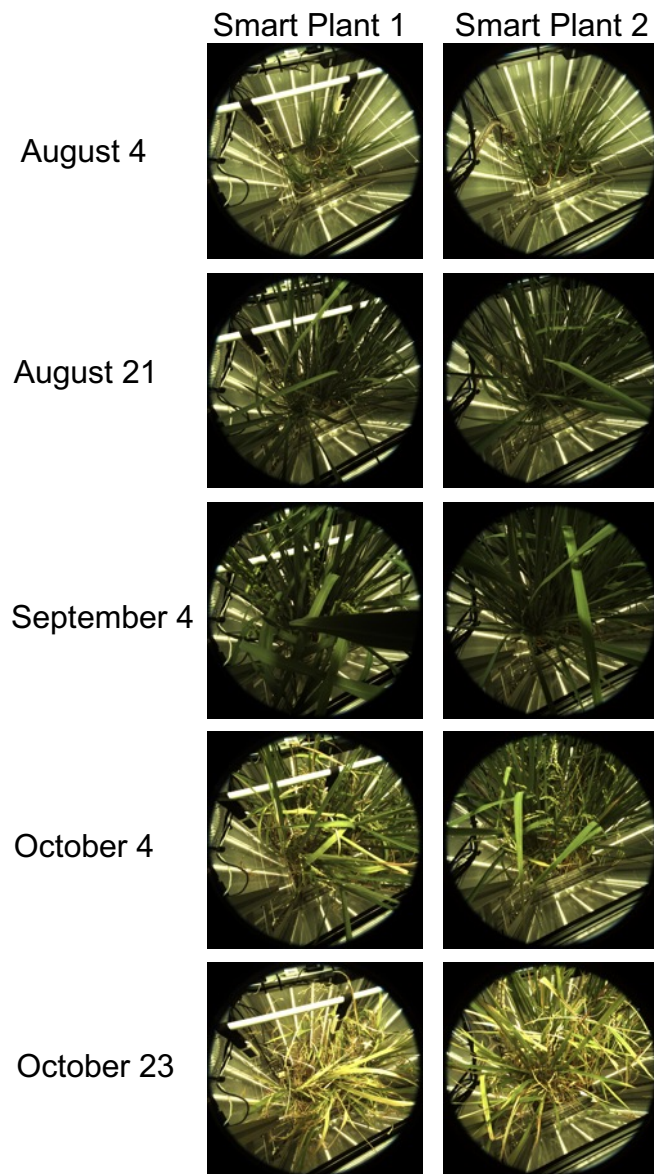

Supplementary Figure S2. Photograph of rice seedlings captured with the fixed-point camera.

Supplementary Table S1 Evaluation of brown rice from each test; (a) greenhouse and (b) Smart Plant system

(a)

|                              | The ratio to the total number of grains (%) |            |              |          |        |
|------------------------------|---------------------------------------------|------------|--------------|----------|--------|
|                              | Normal                                      | White-core | Other Chalky | Immature | Others |
| Control                      | 31.1                                        | 30.9       | 29.9         | 7.6      | 0.6    |
| Plasma irradiation at DAF 1  | 9.1                                         | 21.3       | 36.2         | 4.3      | 0.0    |
| Plasma irradiation at DAF 5  | 11.5                                        | 28.8       | 18.6         | 11.9     | 0.0    |
| Plasma irradiation at DAF 10 | 9.7                                         | 46.0       | 32.0         | 6.0      | 2.0    |
| Plasma irradiation at DAF 15 | 16.3                                        | 44.0       | 17.9         | 4.8      | 1.2    |

(b)

|                              | The ratio to the total number of grains (%) |            |              |          |        |
|------------------------------|---------------------------------------------|------------|--------------|----------|--------|
|                              | Normal                                      | White-core | Other Chalky | Immature | Others |
| Control                      | 79.0                                        | 4.3        | 15.0         | 1.6      | 0.0    |
| Plasma irradiation at DAF 1  | 78.2                                        | 2.6        | 15.4         | 1.3      | 2.6    |
| Plasma irradiation at DAF 5  | 45.8                                        | 27.1       | 16.9         | 10.2     | 0.0    |
| Plasma irradiation at DAF 10 | 40.2                                        | 22.0       | 22.0         | 15.9     | 0.0    |
| Plasma irradiation at DAF 15 | 32.2                                        | 32.2       | 28.9         | 5.6      | 1.1    |
